# Supplementary material for: Chemistry of Homocysteine Thiolactone in A Prebiotic Perspective
Source: MDPI journal article supplement (doi:10.3390/life9020040), 2019-05-16

**Supplementary material for:**

**Prebiotic chemistry of homocysteine and its thiolactone**

Ibrahim Shalayel and Yannick Vallée\*

Univ. Grenoble Alpes, CNRS, Département de Chimie Moléculaire, Campus, Grenoble,  
France

|                                                                   |    |
|-------------------------------------------------------------------|----|
| 1- Copies of NMR spectra of <b>3</b>                              | 2  |
| 2- <sup>13</sup> C NMR of <b>1</b> and <b>4</b> mixture           | 4  |
| 3- <sup>13</sup> C NMR of <b>7</b>                                | 6  |
| 4- <sup>1</sup> H-NMR of (CH <sub>2</sub> -S) protons of <b>7</b> | 7  |
| 5- Copies of Mass spectrometry of <b>7</b> and <b>8</b>           | 8  |
| 6- ESI analysis of <b>4</b> and <b>5</b> reaction mixture         | 10 |

<sup>1</sup>H NMR of **3**

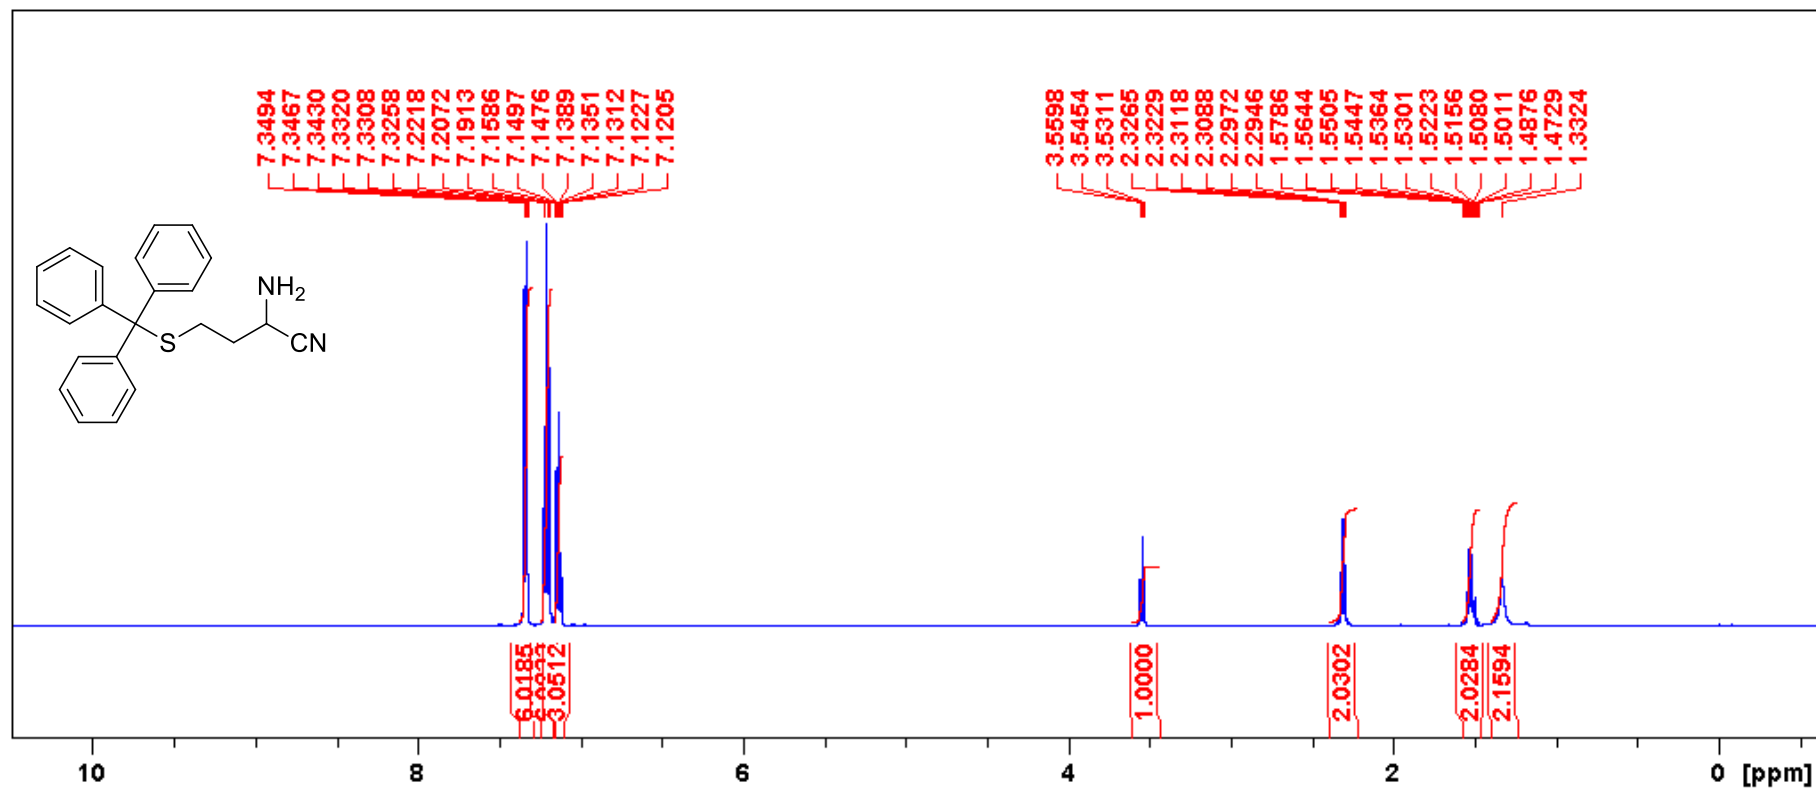

$^{13}\text{C}$  NMR of **3**

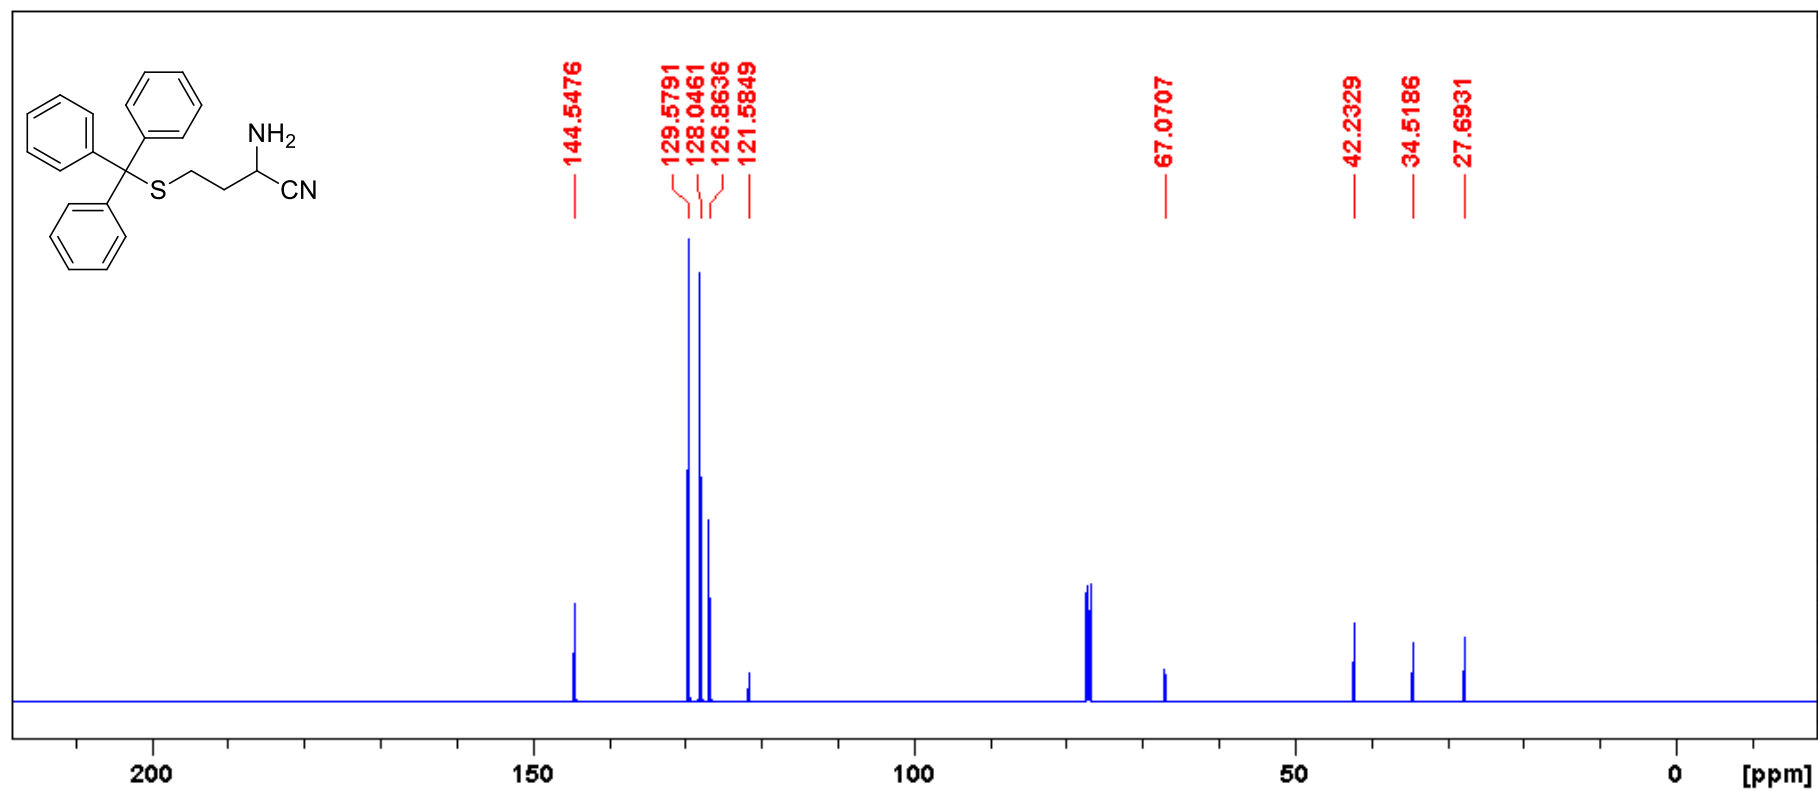

$^{13}\text{C}$  NMR of a mixture of **1** and **4**

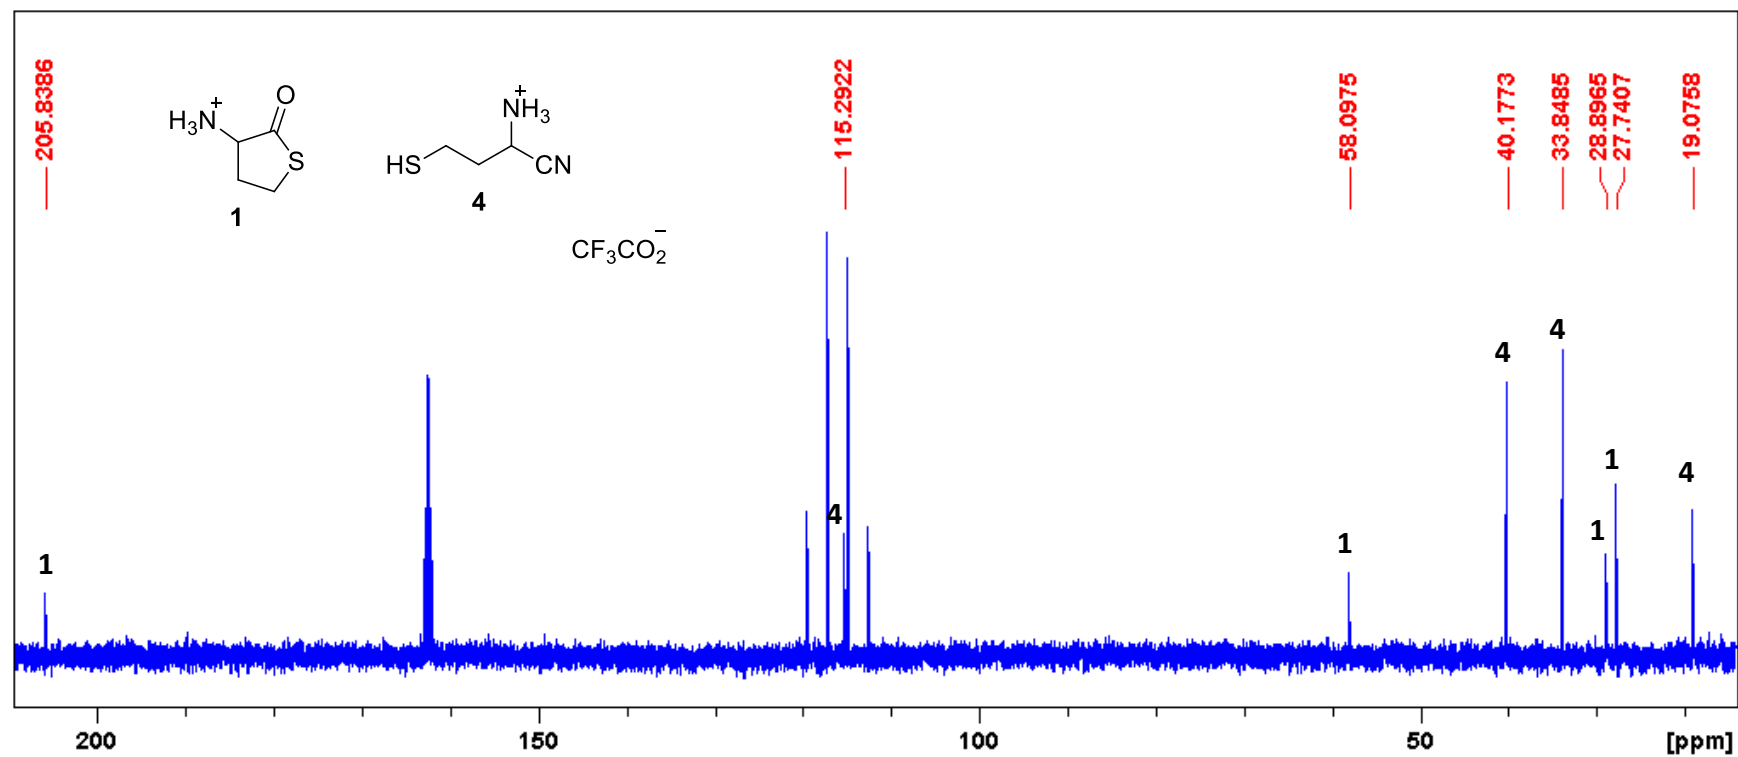

$^{13}\text{C}$  NMR of Hcy-thiolactone **4**

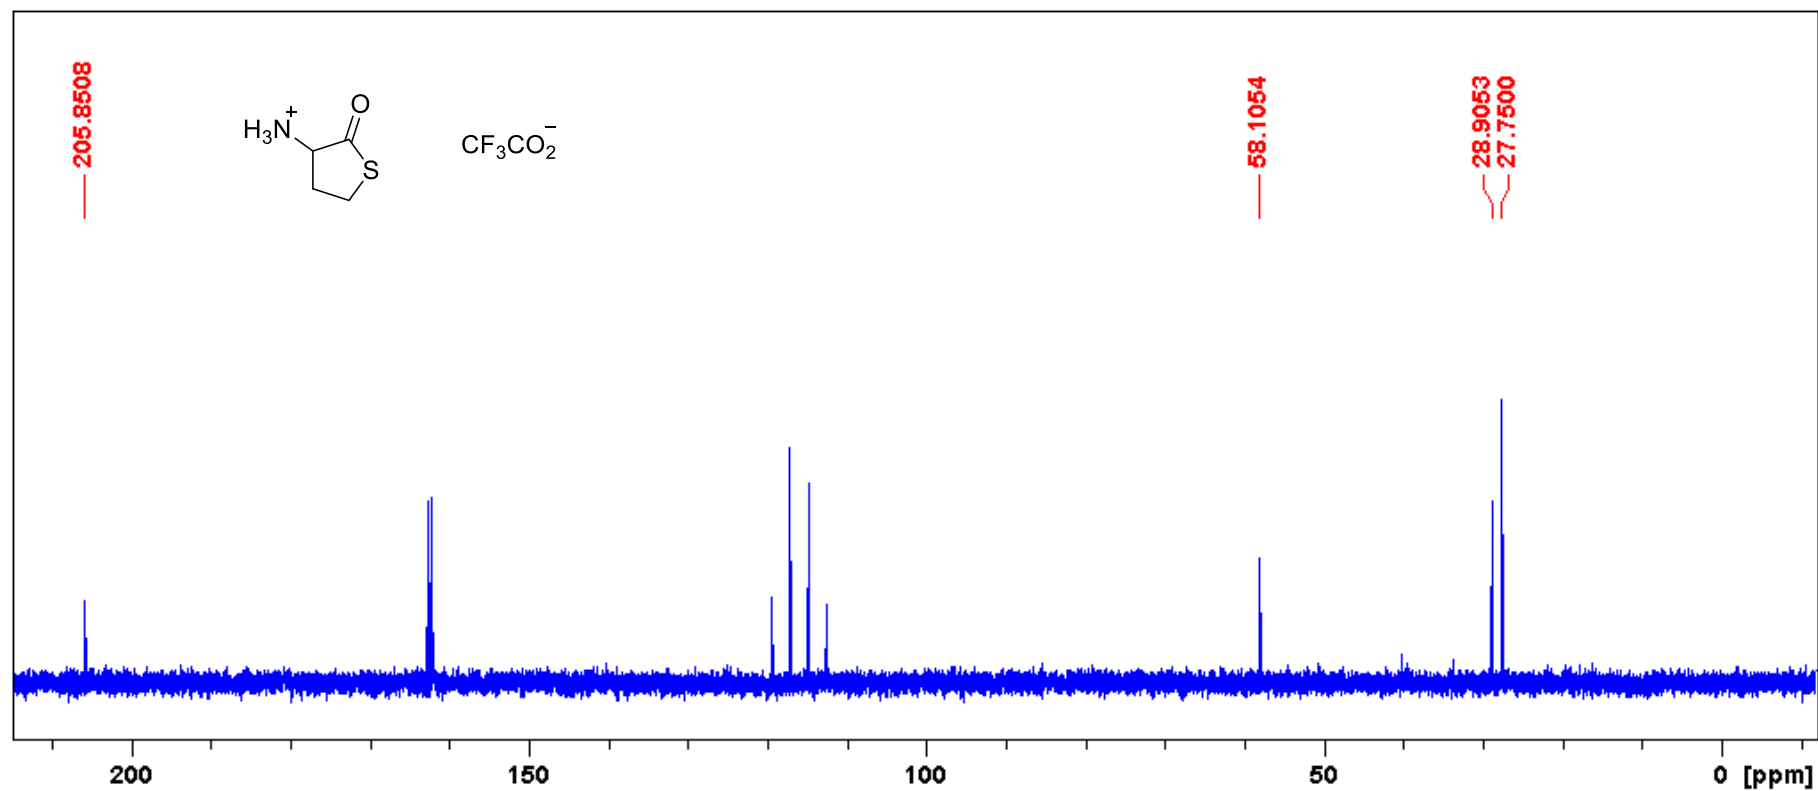

$^{13}\text{C}$  NMR of a reaction mixture between Hcy-thiolactone **4** and Gly-CN **5**, peaks corresponding to **7** are identified.

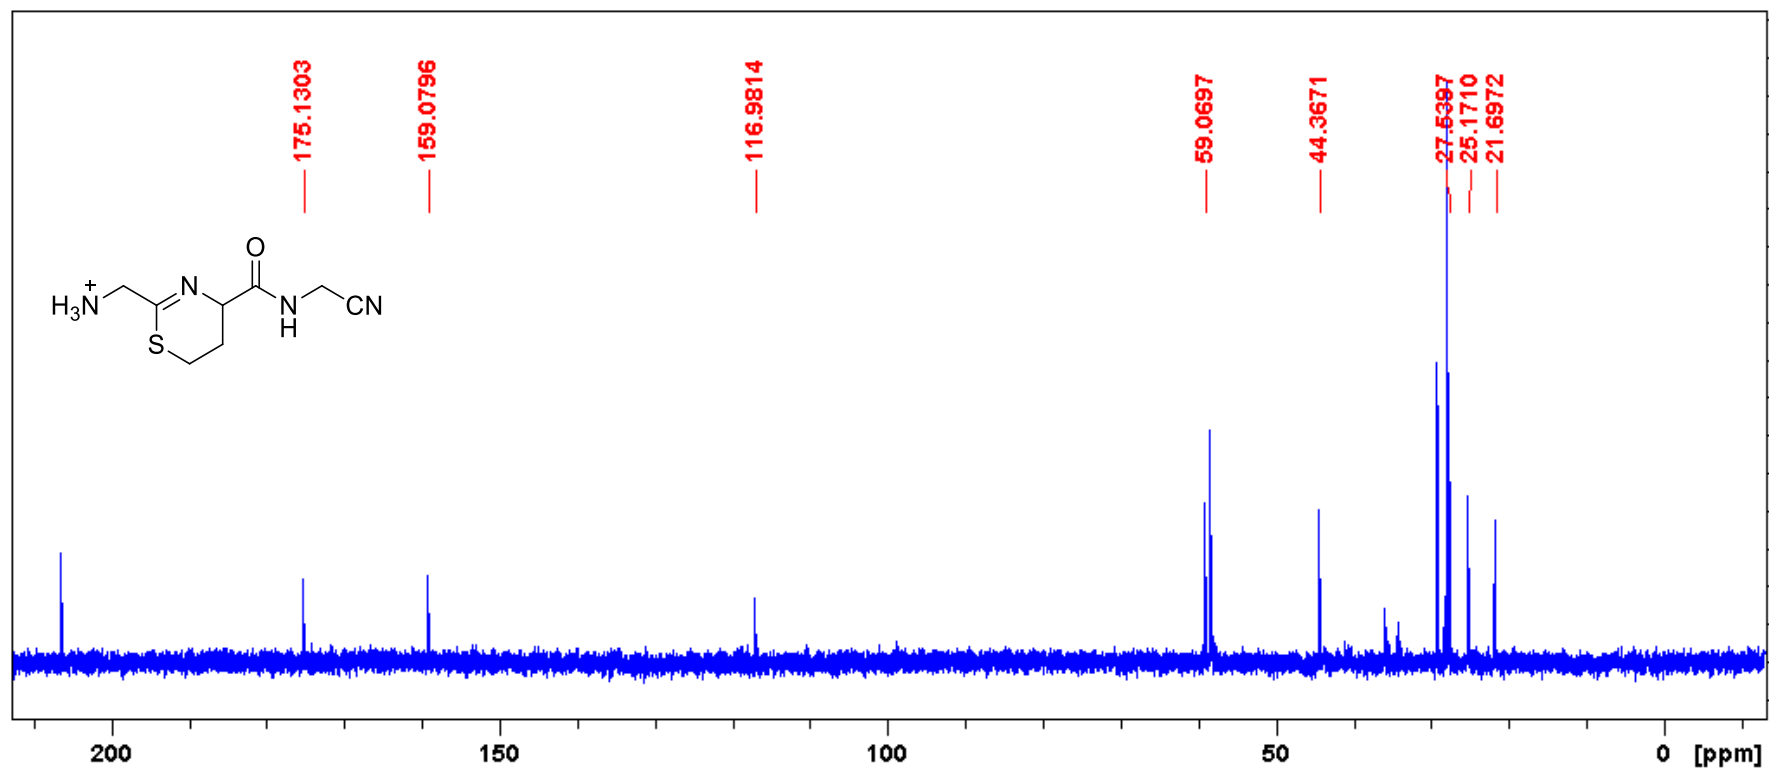

$^1\text{H}$ -NMR of ( $\text{CH}_2\text{-S}$ ) protons: **a)** dihydrothiazine **7**, **b)** Gly-Hcy dihydrothiazine 2-(ammoniomethyl)-5,6-dihydro-4H-1,3-thiazine-4-carboxylate, **c)** a mixture of **7** and Gly-Hcy dihydrothiazine.

**a)** Gly-Hcy dihydrothiazine cycle (obtained by mixing homocysteine and aminoacetonitrile in  $\text{D}_2\text{O}$  at  $45^\circ\text{C}$  for 2 hours). **b)** Cycle **7** (obtained by mixing Hcy-thiolactone **4** with aminoacetonitrile in  $\text{D}_2\text{O}$  at  $45^\circ\text{C}$  for 3 hours). **c)** Mixture of the two previous solutions together confirming that the observed cycle **7** is not the Gly-Hcy dihydrothiazine cycle.

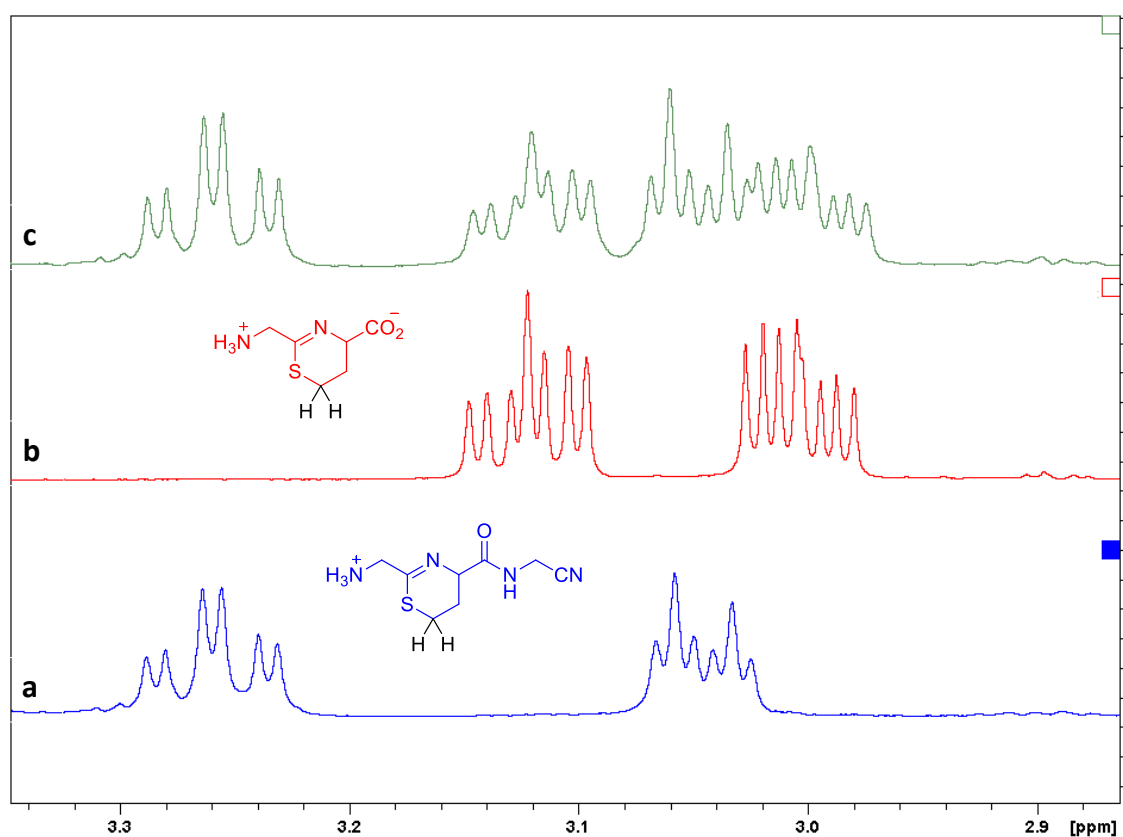

HRMS of **7** in the mixture

calcd for  $\text{C}_8\text{H}_{13}\text{N}_4\text{OS}$   $[\text{M} + \text{H}]^+$ : 213.0810, found 213.0806

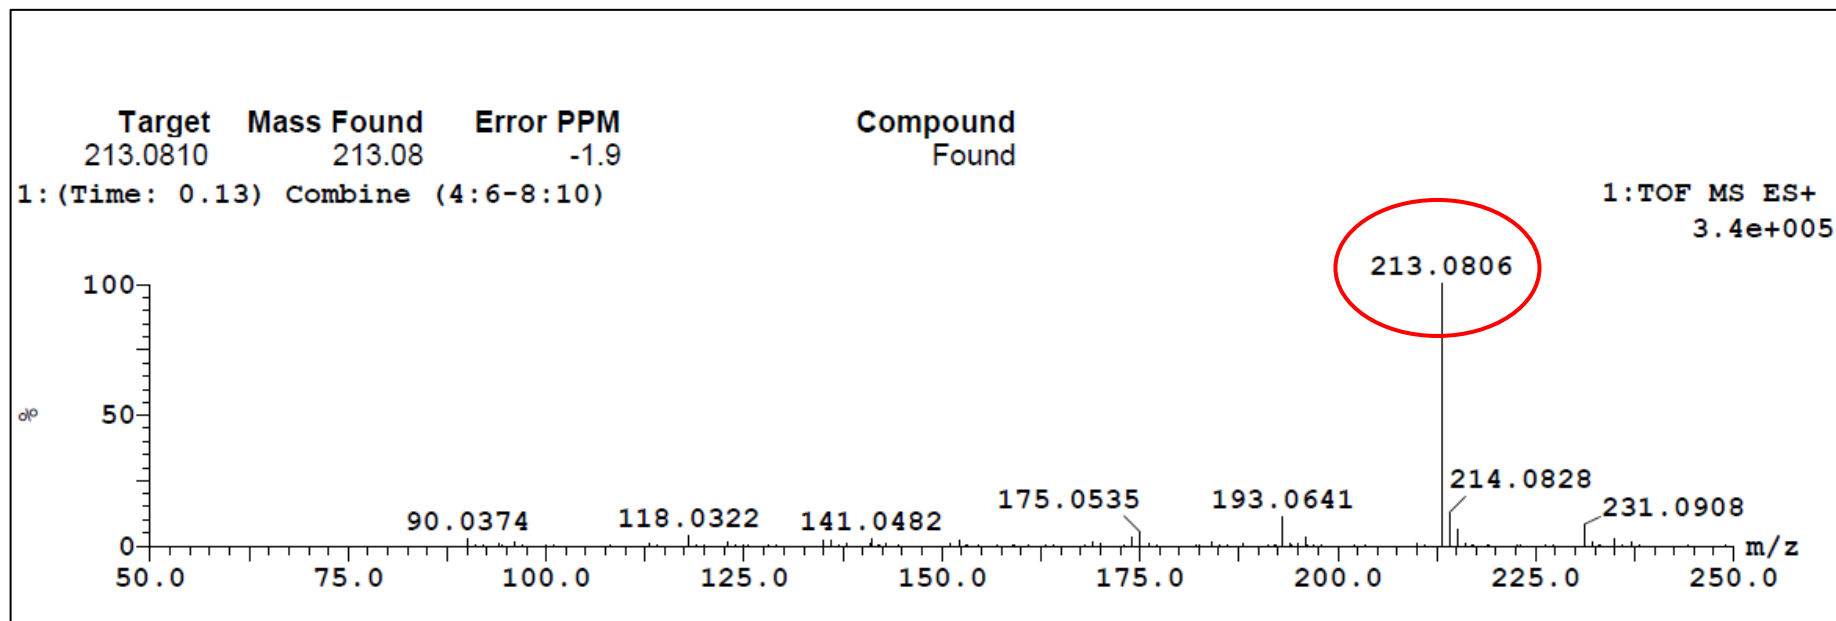



HRMS of **8** in the mixture

calcd for  $\text{C}_8\text{H}_{15}\text{N}_4\text{O}_2\text{S}$   $[\text{M} + \text{H}]^+$ : 231.0916, found 231.0917)

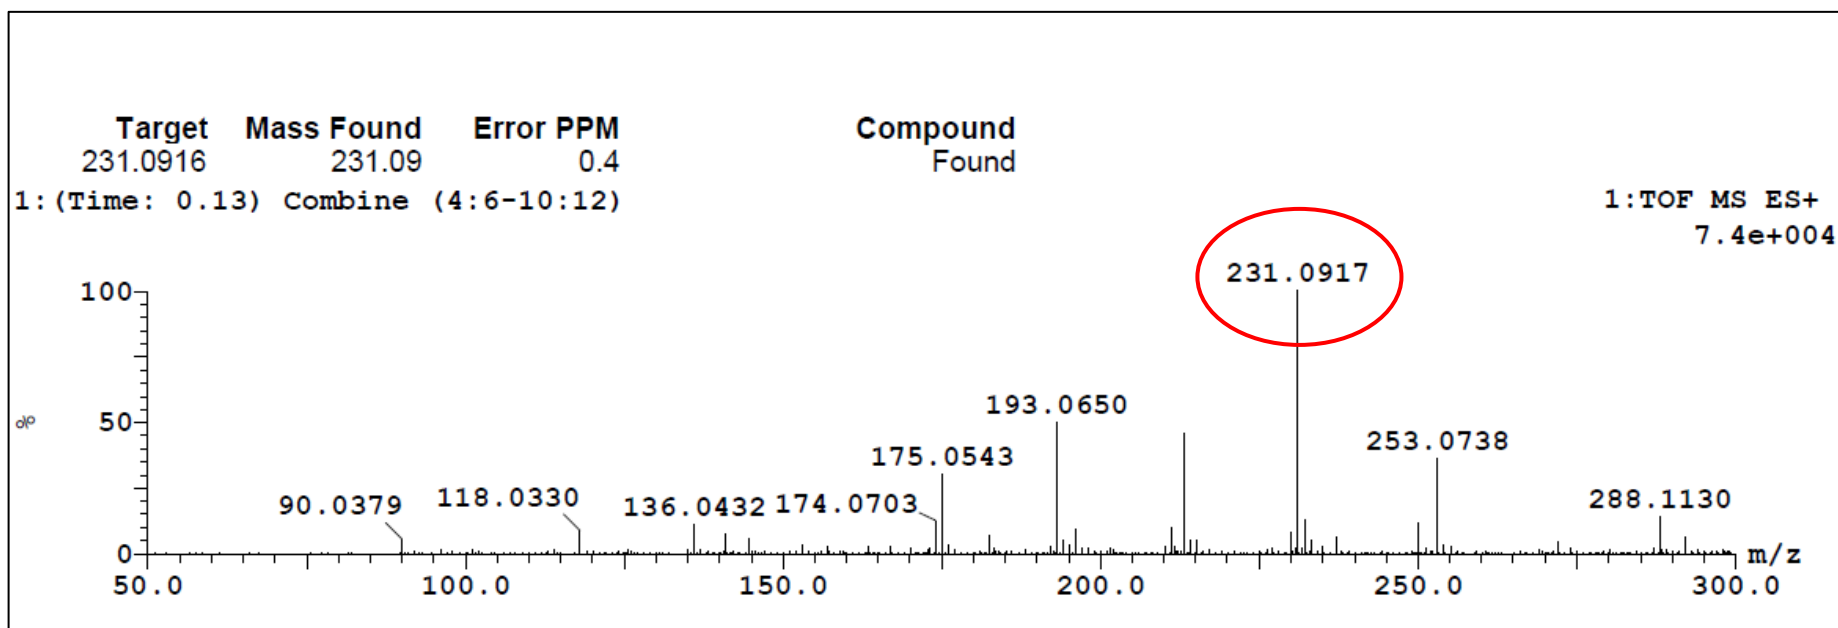

ESI spectrum (law resolution) of **4** and **5** reaction mixture in H<sub>2</sub>O.

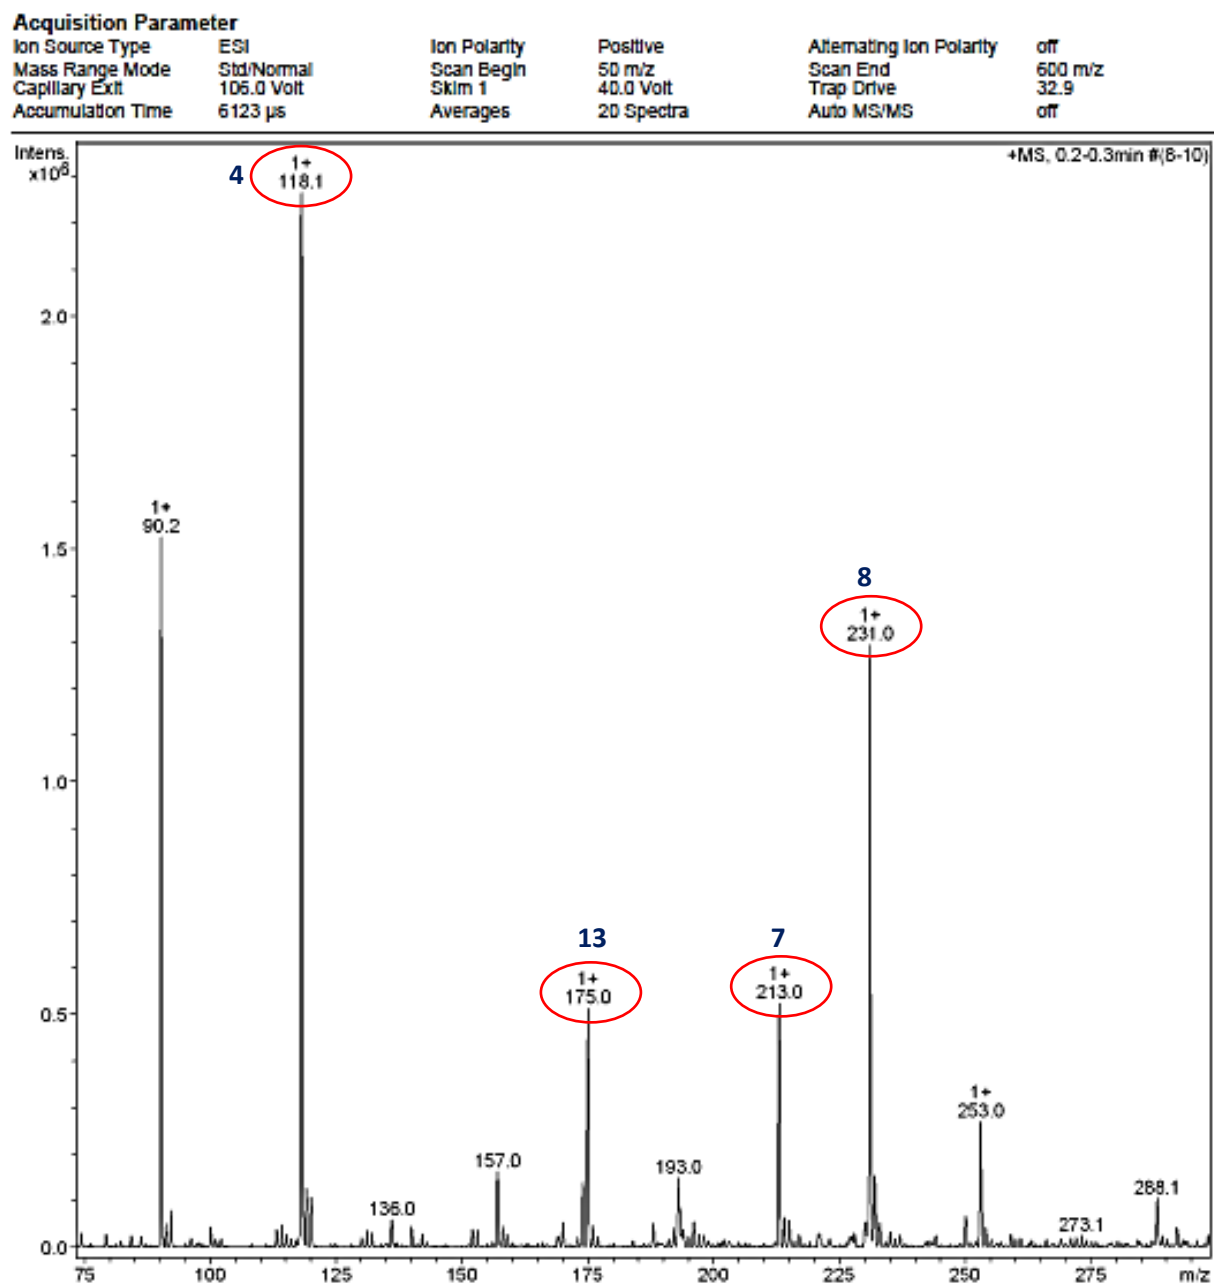

Supplement: s1 [file s1]
